# Supplementary material for: Metal oxo cluster-based coordination polymers with rigid 1,4-naphthalenedicarboxylate and semirigid 1,3-di(4-pyridyl)propane ligands: syntheses, structural topologies, and luminescent properties
Source: Royal Society of Chemistry journal article supplement (doi:10.1039/c2ce25938a), 2012-01-01
Supplement: c2ce25938a.pdf [file c2ce25938a.pdf]

Supporting Information

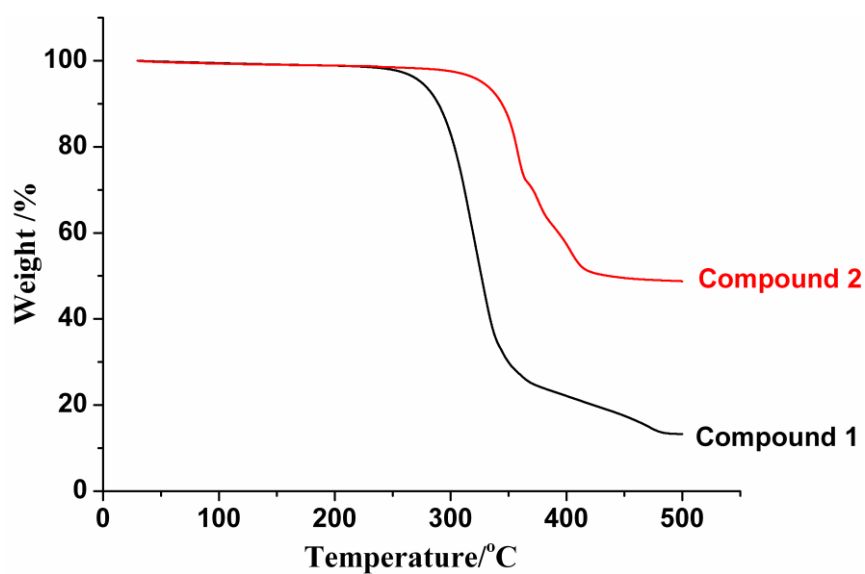

Fig. S1 TGA curves of compounds 1 and 2

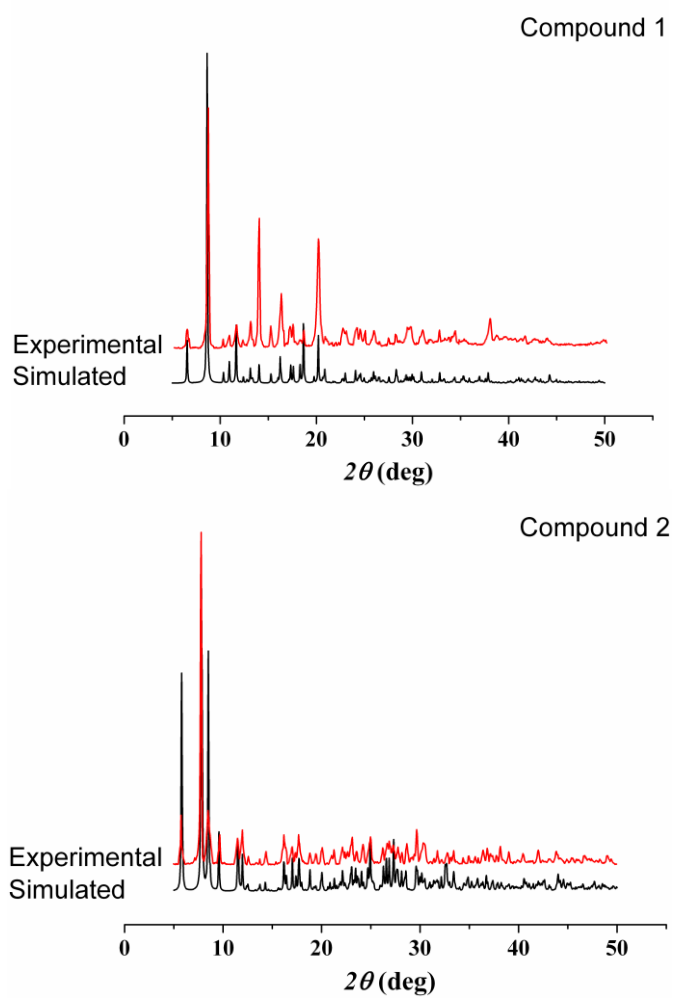

Fig. S2. Powder X-ray diffraction patterns of compounds 1 and 2
